# Supplementary material
Source: MDPI journal article supplement (https://www.mdpi.com/2079-3197/7/4/68)
Supplement: s1 [file s1]

Supporting Information for

The low lying double-exciton state of conjugated  
diradicals: assessment of TDUDFT and spin-flip  
TDDFT predictions.

Sofia Canola<sup>1</sup>, Yasi Dai<sup>1</sup> and Fabrizia Negri<sup>1,2</sup>

<sup>1</sup>Università di Bologna, Dipartimento di Chimica ‘Giacomo Ciamician’, Via F. Selmi 2, 40126 Bologna,  
Italy

<sup>2</sup>INSTM, UdR Bologna, Italy.

**Table S1** Absolute energies of the CS and BS equilibrium structures for the systems investigated. The functional used in the calculations is the B3LYP, the basis set is 6-31G\*.

| molecule    | <i>CS B3LYP</i> | <i>BS B3LYP</i> |
|-------------|-----------------|-----------------|
| <b>NZ</b>   | -1383,936580    | -1383,942002    |
| <b>DIPh</b> | -1774,623756    | -1774,629582    |
| <b>PT</b>   | -1381,599172    | -1381,606370    |
| <b>SOZ</b>  | -1765,093753    | -1765,111034    |

**Table S2** Overlap ( $S$ ) between BS frontier molecular orbitals  $H_\alpha$ ,  $H_\beta$ ,  $L_\alpha$ ,  $L_\beta$  obtained from UB3LYP/6-31G\* calculations for the singlet open-shell configuration, along with the diradical character computed at PUB3LYP level. All data are computed employing the BS UB3LYP/6-31G\* optimized geometry.

|             | $y_0$ <i>PUB3LYP</i> | $S(H_\alpha H_\beta)$ | $S(L_\alpha L_\beta)$ | $S(H_\alpha L_\beta)$<br>and<br>$S(H_\beta L_\alpha)$ |
|-------------|----------------------|-----------------------|-----------------------|-------------------------------------------------------|
| <b>NZ</b>   | 0.23                 | 0.45                  | -0.50                 | 0.87                                                  |
| <b>DIPh</b> | 0.28                 | 0.40                  | -0.46                 | 0.86                                                  |
| <b>PT</b>   | 0.36                 | 0.33                  | -0.37                 | 0.92                                                  |
| <b>SOZ</b>  | 0.66                 | 0.15                  | -0.18                 | 0.97                                                  |

**Table S3** Diradical character  $y_0$  computed at PUB3LYP level and orbital rotation angle  $\theta$  deduced from HOMO and LUMO BS orbitals decomposition.

|                 | $y_0$ PUB3LYP     | $\theta$ (HOMO) | $\theta$ (LUMO) |
|-----------------|-------------------|-----------------|-----------------|
| <b>2TIO</b>     | 0.10 <sup>1</sup> | 28.3            | 25.8            |
| <b>QDTBDT</b>   | 0.14 <sup>1</sup> | 29.5            | 27.1            |
| <b>NZ</b>       | 0.23              | 31.8            | 30.7            |
| <b>BISPHE</b>   | 0.26 <sup>1</sup> | 32.9            | 31.8            |
| <b>DIPh</b>     | 0.28              | 34.9            | 31.8            |
| <b>DFB</b>      | 0.30 <sup>1</sup> | 38.7            | 32.9            |
| <b>FP</b>       | 0.34 <sup>1</sup> | 37.7            | 33.9            |
| <b>PT</b>       | 0.36              | 35.9            | 33.9            |
| <b>TPQ</b>      | 0.42 <sup>1</sup> | 41.4            | 35.9            |
| <b>SHZ</b>      | 0.52 <sup>1</sup> | 38.7            | 37.8            |
| <b>SOZ</b>      | 0.66              | 41.4            | 40.5            |
| <b>QANTHENE</b> | 0.71 <sup>1</sup> | 43.3            | 41.4            |

<sup>1</sup> From ref. [1].

**Table S4** Computed TD-UB3LYP excitation energies, spin contamination  $S^2$ , wavefunction composition, oscillator strength  $f$  of the double-exciton state ( $H, H \rightarrow L, L$ ) and the available experimental excitation energies for the systems investigated.

| Excited state character $\rightarrow$ |               | $(H, H \rightarrow L, L)^a$ |       |                                                                          |       |                   |
|---------------------------------------|---------------|-----------------------------|-------|--------------------------------------------------------------------------|-------|-------------------|
|                                       | $y_0$ PUB3LYP | $E(eV)$                     | $S^2$ | $wf$                                                                     | $f$   | $Exp/eV$          |
| <b>NZ</b>                             | 0.23          | 1.22                        | 0.63  | 0.68 $H\alpha \rightarrow L\alpha$ ;<br>0.68 $H\beta \rightarrow L\beta$ | 0.000 | 1.39 <sup>b</sup> |
| <b>DIPh</b>                           | 0.28          | 1.21                        | 0.49  | 0.68 $H\alpha \rightarrow L\alpha$ ;<br>0.68 $H\beta \rightarrow L\beta$ | 0.000 | 1.18 <sup>c</sup> |
| <b>PT</b>                             | 0.36          | 1.13                        | 0.36  | 0.70 $H\alpha \rightarrow L\alpha$ ;<br>0.70 $H\beta \rightarrow L\beta$ | 0.000 | 1.23 <sup>d</sup> |
| <b>SOZ</b>                            | 0.66          | 1.41                        | 0.74  | 0.47 $H\alpha \rightarrow L\alpha$ ;<br>0.47 $H\beta \rightarrow L\beta$ | 0.000 | 1.07 <sup>e</sup> |

<sup>a</sup> Geometry optimized at UB3LYP/6-31G\* (BS) level of theory. <sup>b</sup> Measured in DCM, from ref. [2]. <sup>c</sup> Measured in DCM, from ref. [3]. <sup>d</sup> Measured in DCM, from ref. [4]. <sup>e</sup> Measured in CCl<sub>4</sub>, from ref. [5].

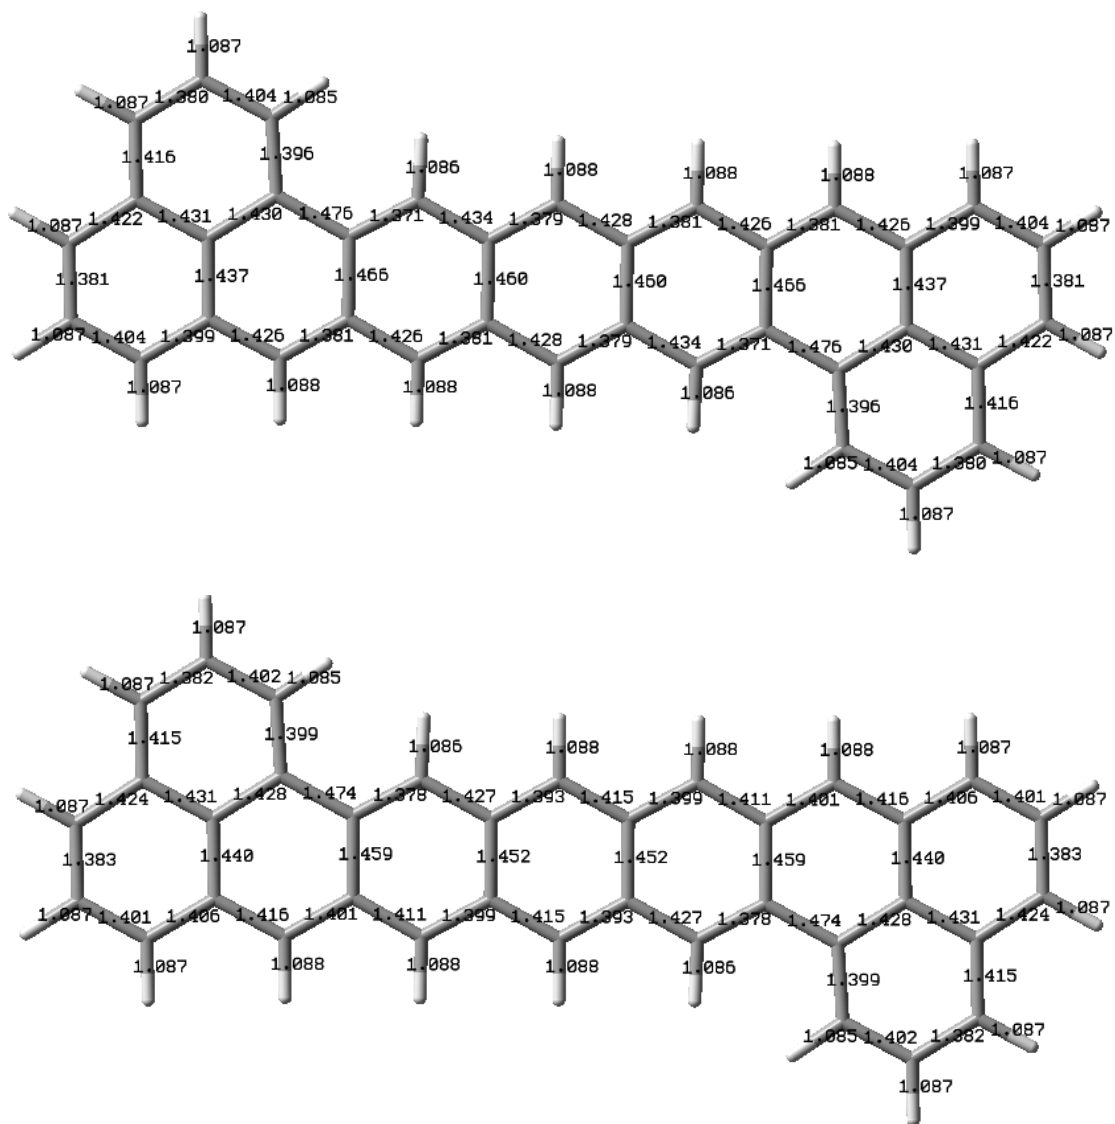

**Figure S1.** NZ: (top) CS and (bottom) BS equilibrium structures from B3LYP/6-31G\* calculations.



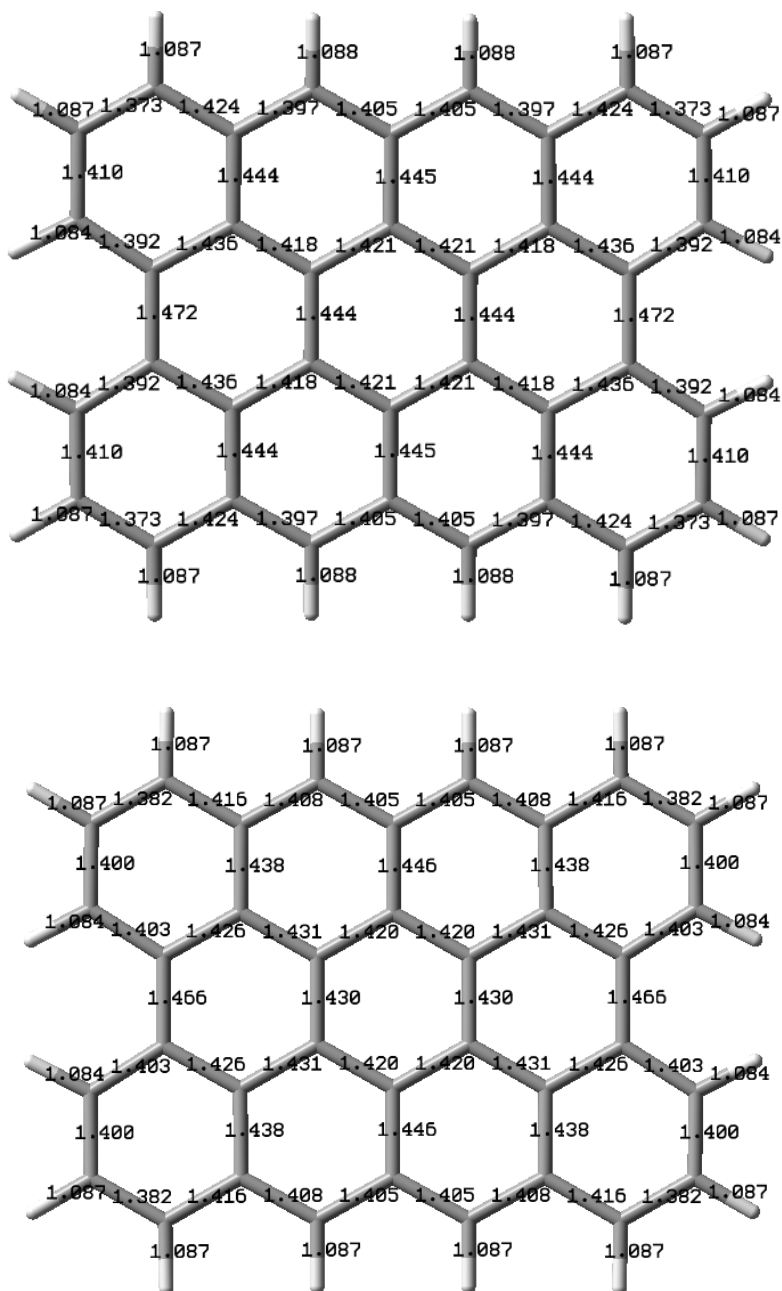

**Figure S3.** PT: (top) CS and (bottom) BS equilibrium structures from B3LYP/6-31G\* calculations.

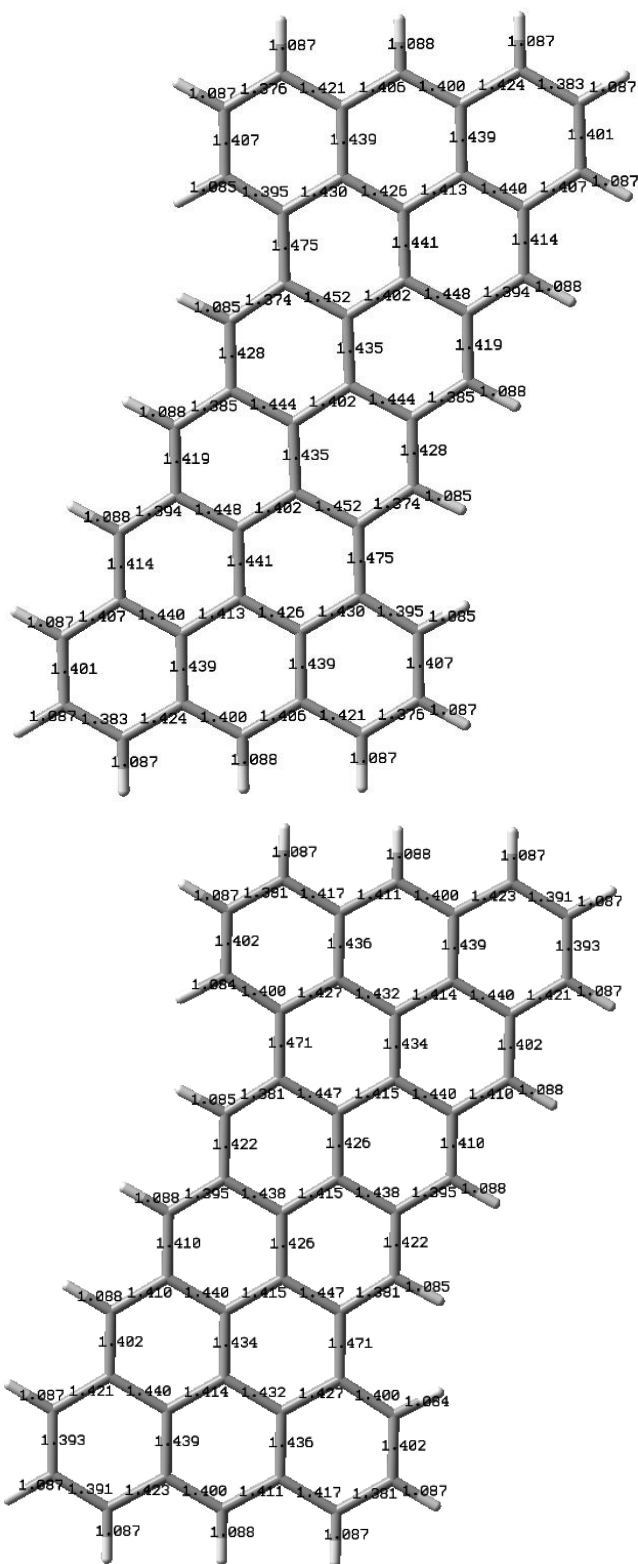

**Figure S4.** SOZ: (top) CS and (bottom) BS equilibrium structures from B3LYP/6-31G\* calculations.

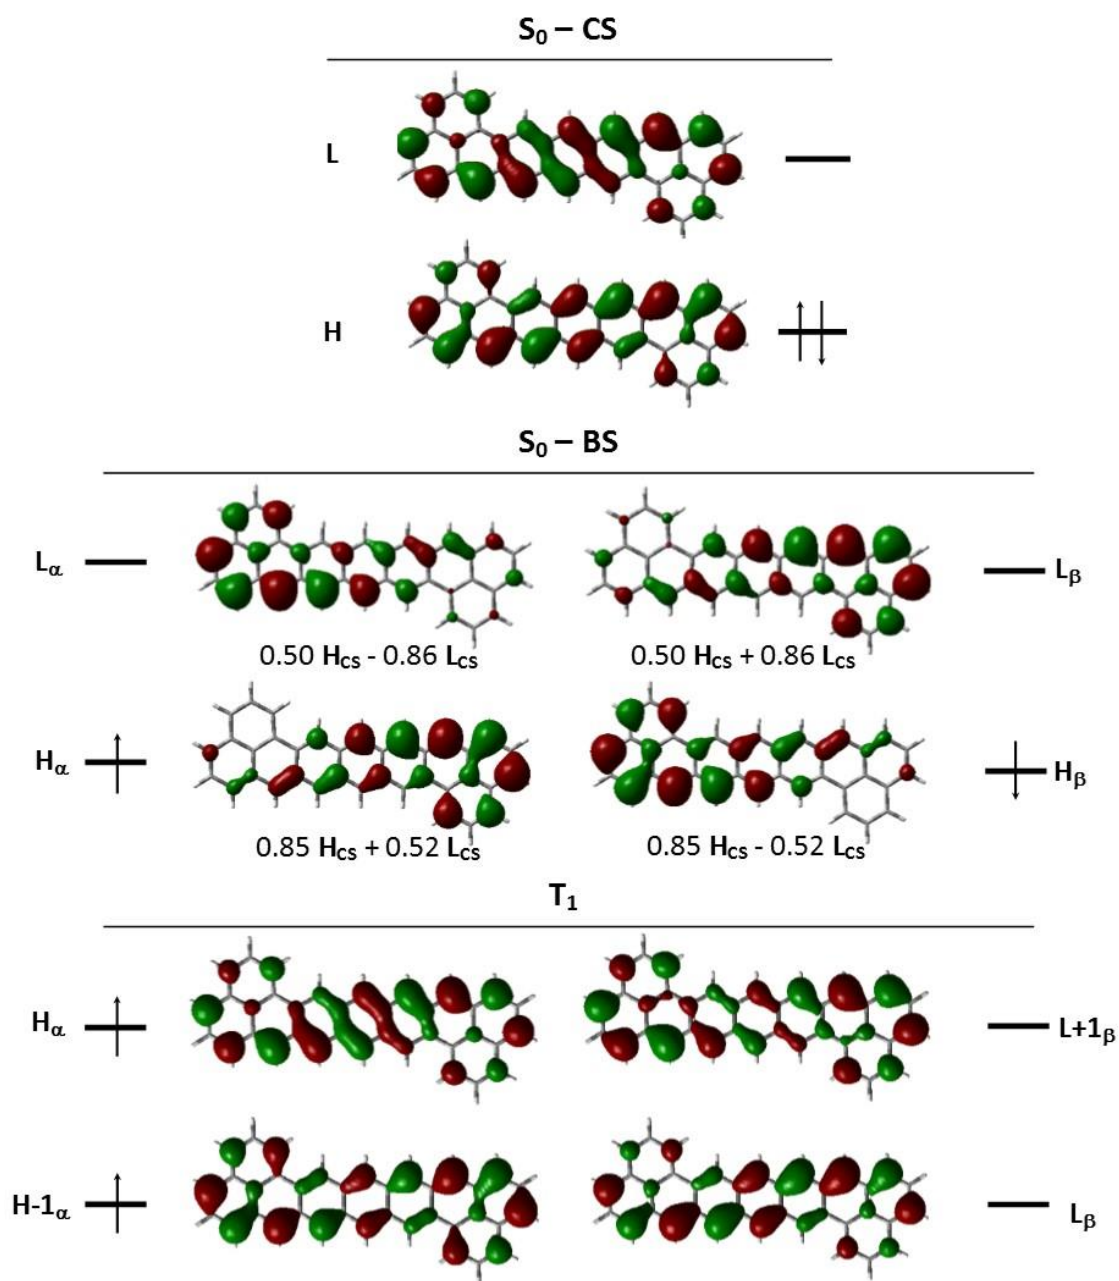

**Figure S5.** Frontier molecular orbitals of NZ computed with (top) a CS singlet reference configuration, (middle) a BS singlet open-shell configuration and (bottom) a triplet configuration, at the optimized BS UB3LYP geometry of the singlet ground state ( $y_0(\text{PUB3LYP}) = 0.23$ ). Each localized orbital (BS) is also expressed as a linear combination of the delocalized (CS) orbitals.

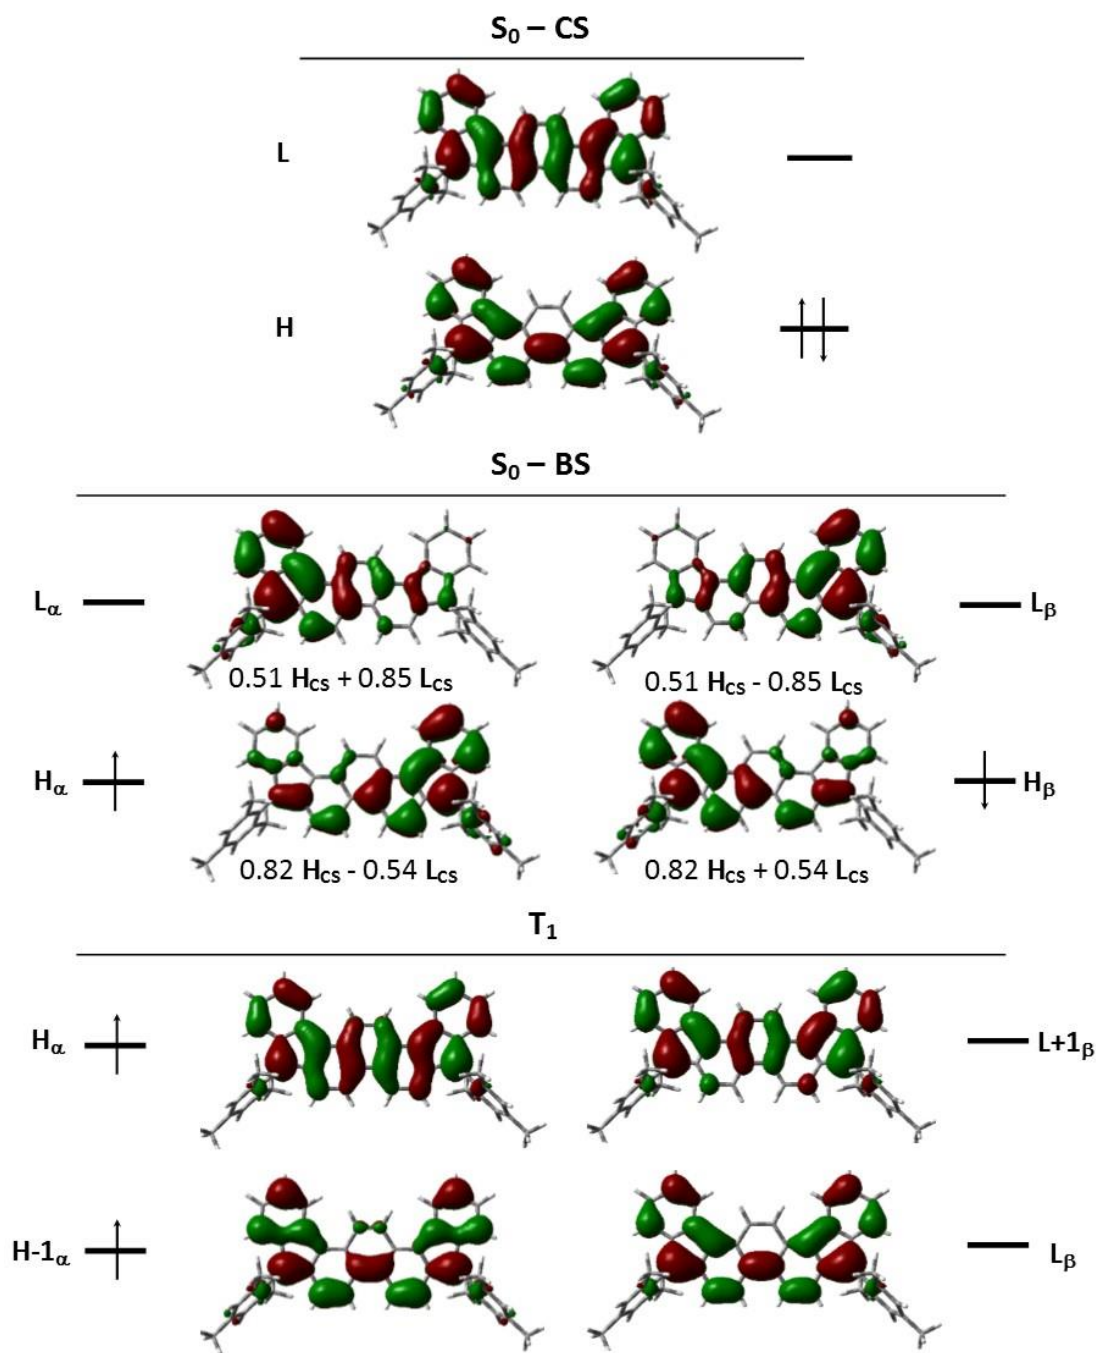

**Figure S6.** Frontier molecular orbitals of DIPh computed with (top) a CS singlet reference configuration, (middle) a BS singlet open-shell configuration and (bottom) a triplet configuration, at the optimized BS UB3LYP geometry of the singlet ground state ( $\gamma_0(\text{PUB3LYP}) = 0.28$ ). Each localized orbital (BS) is also expressed as a linear combination of the delocalized (CS) orbitals.

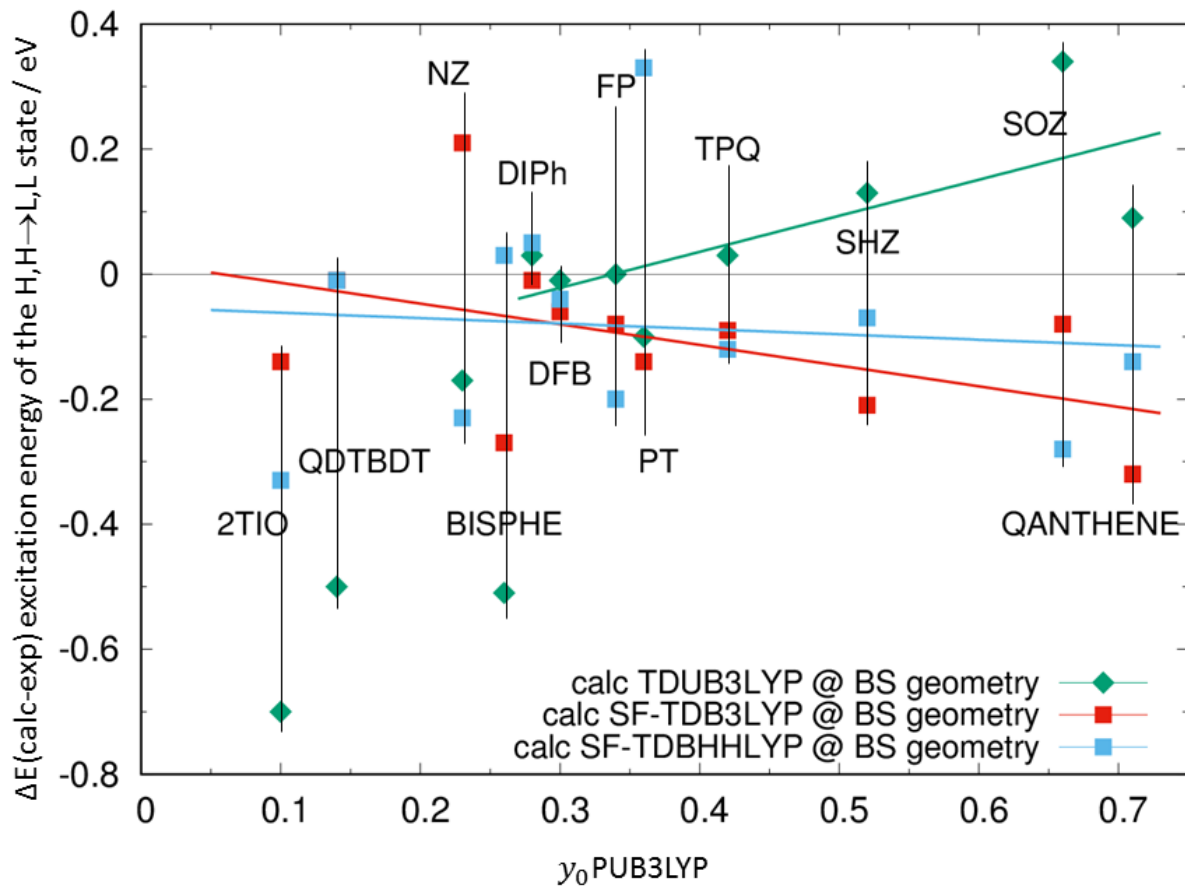

**Figure S7.** Difference between computed and observed excitation energy of the double exciton (H,H $\rightarrow$ L,L) state versus the computed  $y_0$  at PUB3LYP level: (red squares) SF-TDB3LYP at BS B3LYP geometry; (blue squares) SF-TDBHLYP at BS B3LYP geometry; (green diamonds) TDUB3LYP at the same geometry. The lines in the same colours are linear fittings of the computed data. Vertical bars indicate the compound to which computed data correspond. Some data are taken from ref. [1].

## References

1. Canola, S.; Casado, J.; Negri, F. The double exciton state of conjugated chromophores with strong diradical character: insights from TDDFT calculations. *Phys. Chem. Chem. Phys.* **2018**, *20*, 24227-24238. DOI: 10.1039/C8CP04008G.
2. Huang, R.; Phan, H.; Herng, T.S.; Hu, P.; Zeng, W.; Dong, S.-q.; Das, S.; Shen, Y.; Ding, J.; Casanova, D.; Wu, J. Higher Order  $\pi$ -Conjugated Polycyclic Hydrocarbons with Open-Shell Singlet Ground State: Nonazethrene versus Nonacene. *J. Am. Chem. Soc.* **2016**, *138*, 10323-10330. DOI: 10.1021/jacs.6b06188.
3. Majewski, M.A.; Chmielewski, P.J.; Chien, A.; Hong, Y.; Lis, T.; Witwicki, M.; Kim, D.; Zimmerman, P.M.; Stępień, M. 5,10-Dimesityldiindeno[1,2-a:2',1'-i]phenanthrene: a stable biradicaloid derived from Chichibabin's hydrocarbon. *Chem. Sci.* **2019**, *10*, 3413. DOI: 10.1039/c9sc00170k.
4. Ni, Y.; Gopalakrishna, T.Y.; Phan, H.; Herng, T.S.; Wu, S.; Han, Y.; Ding, J.; Wu, J. A Peritetracene Diradicaloid: Synthesis and Properties. *Angew. Chem.* **2018**, *130*, 9845–9849. DOI: 10.1002/anie.201804276.
5. Zeng, W.; Gopalakrishna, T.Y.; Phan, H.; Tanaka, T.; Herng, T.S.; Ding, J.; Osuka, A.; Wu, J. Superoctazethrene: An Open-Shell Graphene-like Molecule Possessing Large Diradical Character but Still with Reasonable Stability. *J. Am. Chem. Soc.* **2018**, *140*, 14054–14058. DOI: 10.1021/jacs.8b09075.
